# Supplementary material
Source: PubMed Central journal article supplement (PMC7927165)
Supplement: NIHMS1625803-supplement-1625803_SuppFigLegends.pdf [file NIHMS1625803-supplement-1625803_SuppFigLegends.pdf]

1 **Supplemental Figure Legends**

2 **Supplemental Figure 1.** a) CPR significantly increases locomotion as measured by total number  
3 of beam breaks in both vehicle-treated (n = 7) and isradipine-treated mice (n = 7). b) SPR  
4 significantly increases locomotion in both vehicle-treated (n = 6) and isradipine-treated mice (n =  
5 5). c) Acquisition did not alter average cocaine-paired duration in mice who would later receive  
6 vehicle (n = 13) or mice who would later receive isradipine (n = 11). d) Acquisition did not alter  
7 number of cocaine-paired entries in mice who would later receive vehicle or mice who would  
8 later receive isradipine. Data are presented as mean + SEM.

9 **Supplemental Figure 2.** a) Acute stress reduces time spent in the open arms of the elevated plus  
10 maze in both WT (n = 8/group) and  $Ca_v1.2^{+/-}$  mice (n = 9/group). b) Acute stress reduces the  
11 percentage of spontaneous alternations performed by both WT (n = 8) and  $Ca_v1.2^{+/-}$  (n = 9) mice.  
12 c) Acute stress increases serum corticosterone (CORT) in both WT and  $Ca_v1.2^{+/-}$  mice (n =  
13 5/group). Data are presented as mean + SEM.

14 **Supplemental Figure 3.** a) Spread of AAV-Cre-GFP expression in animals utilized in  
15 experiments displayed in Figure 2. Dense viral expression was observed at AP +2.0 and sparse  
16 expression was observed ranging between AP +2.4 and AP +1.6. b) Representative optical fiber  
17 placement in animals utilized in experiments displayed in Figure 3. c) Spread of AAV-DREADD  
18 expression in animals utilized in experiments displayed in Figure 4 and Figure 5. Dense  
19 DREADD expression was observed exclusively at AP +2.0, and rare sparse expression was  
20 observed ranging to AP +2.4 in some mice. No differences in DREADD viral spread were  
21 observed between AAV-hM4Di and AAV-hM3Dq or between WT and  $Ca_v1.2$  heterozygous  
22 mice.

23 **Supplemental Figure 4.** a) *cacna1c*-floxed mice were injected with either AAV2-Cre (IL-Cre)  
24 or AAV2-GFP (IL-GFP) into the infralimbic cortex (IL) to focally knockdown Cav1.2  
25 expression. b) Both IL-GFP and IL-Cre mice acquired cocaine CPP ( $***p < 0.001$ ,  $**p < 0.01$ ,  
26 bonferroni post-hoc baseline vs. acquisition). IL-GFP mice extinguished cocaine CPP ( $##p <$   
27  $0.01$ , bonferroni post-hoc acquisition vs. extinction;  $n = 7$ ) while IL-Cre mice did not ( $n = 7$ ). c)  
28 CPR had no effect on the average saline-paired duration or d) the number of saline-paired entries  
29 in PrL-GFP ( $n = 6$ ) or PrL-Cre ( $n = 5$ ) mice. e) SPR had no effect on average saline-paired  
30 duration or f) number of saline-paired entries in PrL-GFP ( $n = 5$ ) or PrL-Cre ( $n = 9$ ) mice. Data  
31 are presented as mean + SEM.

32 **Supplemental Figure 5.** a) Representative image of GFP-tagged cells in the PrL b)  
33 Representative RNAscope in situ hybridization images of *cacna1c* mRNA (red), GFP-tagged  
34 cells (green) and DAPI (blue) in the PrL of control mice injected with AAV-GFP (left) and  
35 experimental mice injected with AAV-fDIO-Cre-GFP into the PrL and retro-AAV-FLP into the  
36 NAcC (right). c) Representative image of positive control mRNA (Polr2a: red) and GFP-tagged  
37 cells in PrL-NAcC Cav1.2 KO mice.

38 **Supplemental Figure 6.** a) PrL→NAcC fiber photometry trace centered around entry into the  
39 cocaine-paired chamber (red) or saline-paired chamber (blue) averaged across entries of vehicle-  
40 treated mice during CPR. b) No difference in mean amplitude was observed prior to cocaine- and  
41 saline-paired entries during the baseline test, c) the acquisition test, or d) the extinction test in  
42 vehicle-treated mice. e) PrL→NAcC fiber photometry trace centered around entry into the  
43 cocaine-paired chamber (magenta) or saline-paired chamber (cyan) averaged across entries of  
44 isradipine-treated mice during CPR. f) No correlation was observed between average amplitude  
45 5 seconds prior to cocaine-paired entry and average saline-paired duration during CPR ( $r = 0.26$ ,

46 n=13). g) PrL→NAcC fiber photometry trace centered on entry into the cocaine-paired chamber  
47 (red) or saline-paired chamber (blue) averaged across entries of vehicle-treated mice during SPR.  
48 h) In vehicle-treated mice, SPR significantly increased the number of events per minute in the  
49 PrL→NAcC projection while mice were in both the saline-paired and cocaine-paired chamber  
50 ( $*p < 0.05$ , bonferroni post-hoc extinction vs. SPR;  $n = 6$ ). i) Acute stress had no effect on the  
51 number of events per minute in the PrL→NAcC projection when recorded in a home cage test ( $n$   
52  $= 5$ ). j) No correlation was observed between the number of events per minute and the number of  
53 saline-paired entries during SPR ( $r = 0.16$ ,  $n = 11$ ). k) Treatment with isradipine had no effect on  
54 PrL→NAcC mean amplitude of calcium events (vehicle,  $n = 5$ ; isradipine,  $n = 6$ , l) the maximum  
55 amplitude of calcium events (vehicle,  $n = 4$ ; isradipine,  $n = 5$ ), or m) the number of events per  
56 minute when tested in a home cage (vehicle/isradipine,  $n = 6$ ). Data are presented as mean +  
57 SEM.

58 **Supplemental Figure 7.** a) No difference in baseline, acquisition, extinction or CPR behavior  
59 was observed between WT hM4Di mice ( $n = 3$ ) and WT sham mice ( $n = 3$ ). b) No difference in  
60 CPP behavior was observed between WT hM4Di ( $n = 4$ ) and WT sham mice ( $n = 7$ ) in a cohort  
61 tested for SPR. c) CPR had no effect on average saline-paired duration in control ( $n = 6$ ) or  
62 hM4Di-expressing mice injected with CNO ( $n = 7$ ). d) SPR had no effect on the number of  
63 saline-paired entries in control ( $n = 11$ ) or hM4Di-expressing mice injected with CNO ( $n = 8$ ).  
64 Data are presented as mean + SEM.

65 **Supplemental Figure 8.** a) No difference in baseline, acquisition, extinction or CPR behavior  
66 was observed between  $Ca_v1.2^{+/-}$  hM3Dq mice ( $n = 4$ ) and  $Ca_v1.2^{+/-}$  sham mice ( $n = 4$ ) in a cohort  
67 tested for CPR. b) No difference in CPP behavior was observed between  $Ca_v1.2^{+/-}$  hM3Dq mice  
68 ( $n = 4$ ) and  $Ca_v1.2^{+/-}$  sham mice ( $n = 4$ ) in a cohort tested for SPR. c) CPR had no effect on

69 average saline-paired duration in  $Cav1.2^{+/-}$  control (n = 8) or  $Cav1.2^{+/-}$  hM3Dq-expressing mice  
70 injected with CNO (n = 7). d) SPR had no effect on the number of saline-paired entries in  
71  $Cav1.2^{+/-}$  control (n = 8) or  $Cav1.2^{+/-}$  hM3Dq-expressing mice injected with CNO (n = 8). Data  
72 are presented as mean + SEM.

73
