# Supplementary material
Source: PubMed Central journal article supplement (PMC7927165)

# Supplemental Figure 1

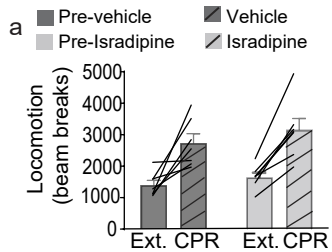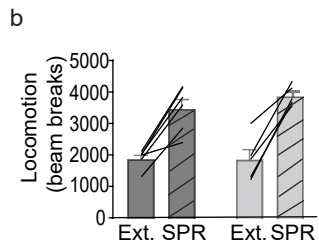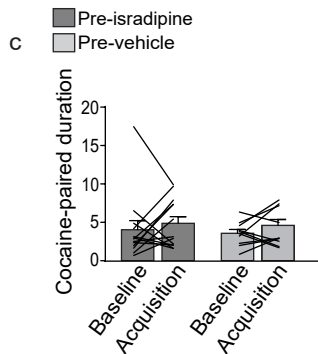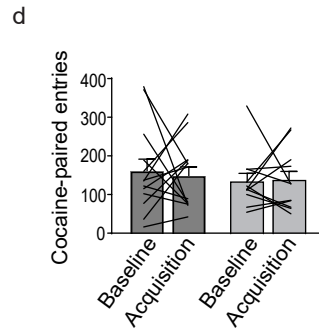

Supplement: NIHMS1625803-supplement-1625803_SuppFig1.pdf [file NIHMS1625803-supplement-1625803_SuppFig1.pdf]

Supplemental Figure 2

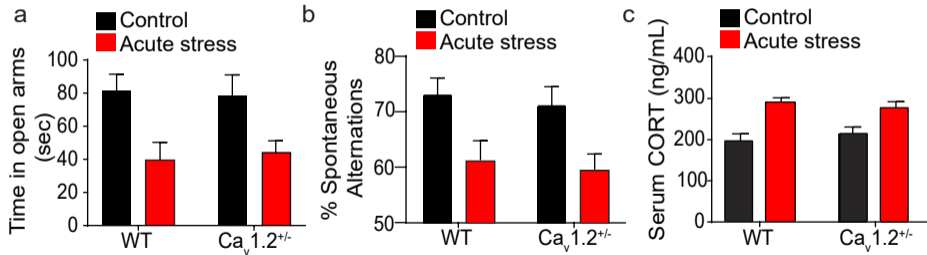

Supplement: NIHMS1625803-supplement-1625803_SuppFig2.pdf [file NIHMS1625803-supplement-1625803_SuppFig2.pdf]

Supplemental Figure 3

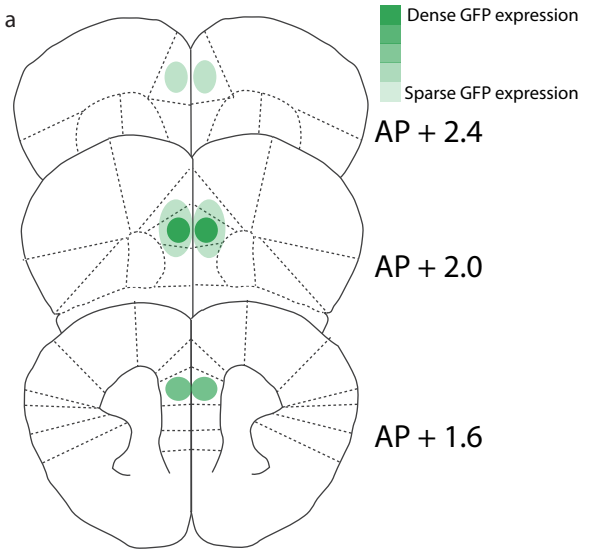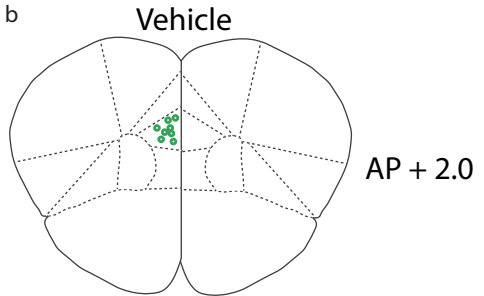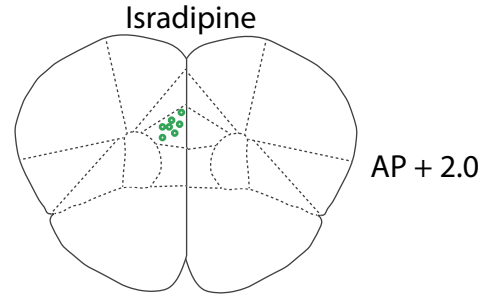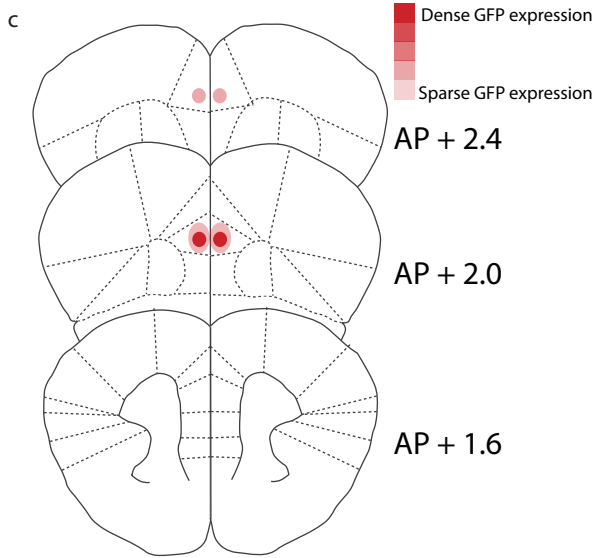

Supplement: NIHMS1625803-supplement-1625803_SuppFig3.pdf [file NIHMS1625803-supplement-1625803_SuppFig3.pdf]

Supplemental Figure 4

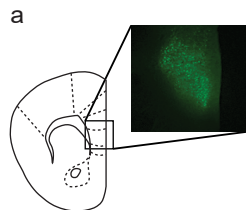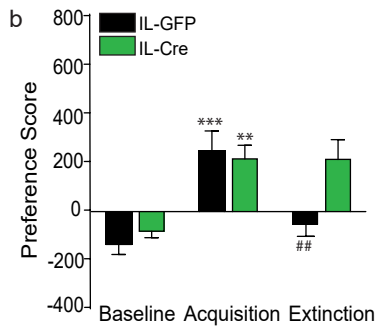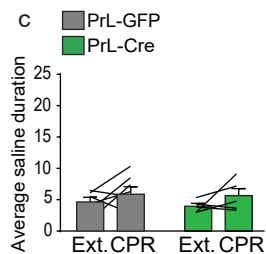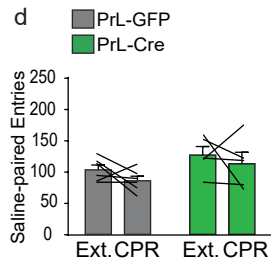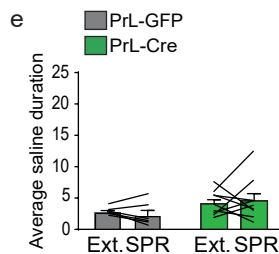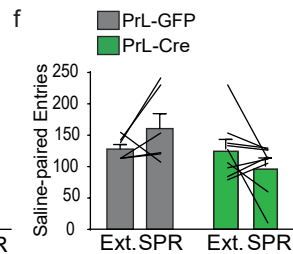

Supplement: NIHMS1625803-supplement-1625803_SuppFig4.pdf [file NIHMS1625803-supplement-1625803_SuppFig4.pdf]

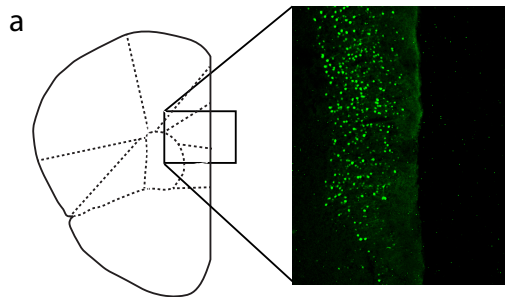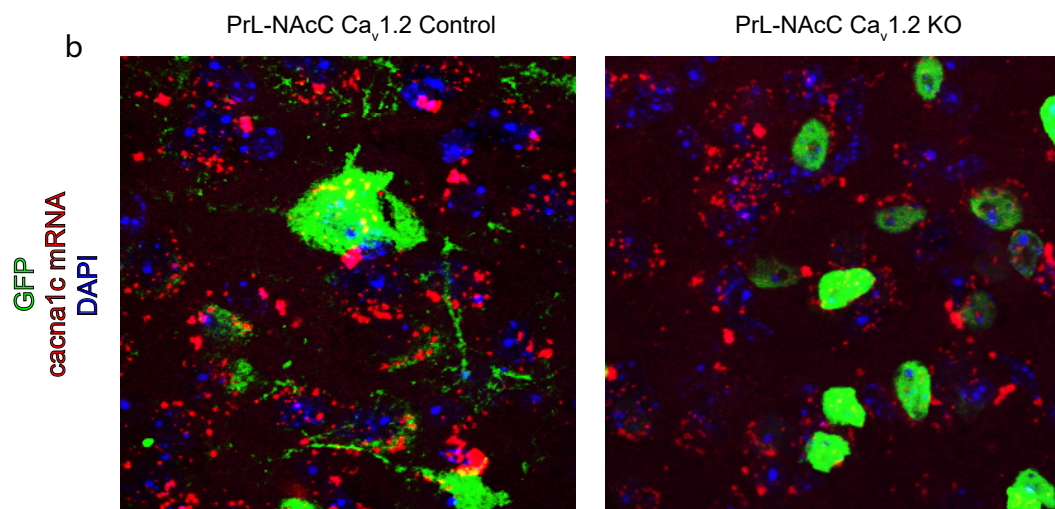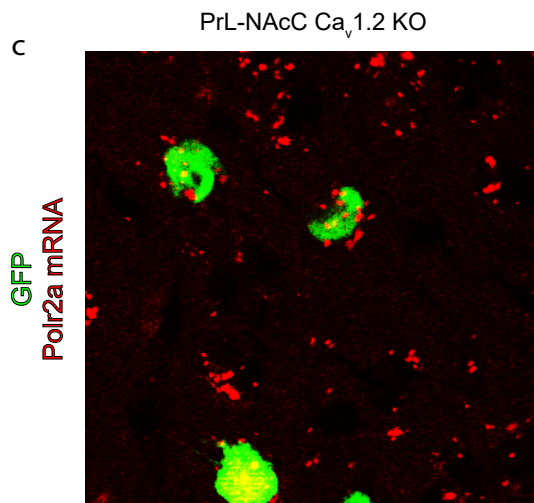

Supplement: NIHMS1625803-supplement-1625803_SuppFig5.pdf [file NIHMS1625803-supplement-1625803_SuppFig5.pdf]

Supplemental Figure 6

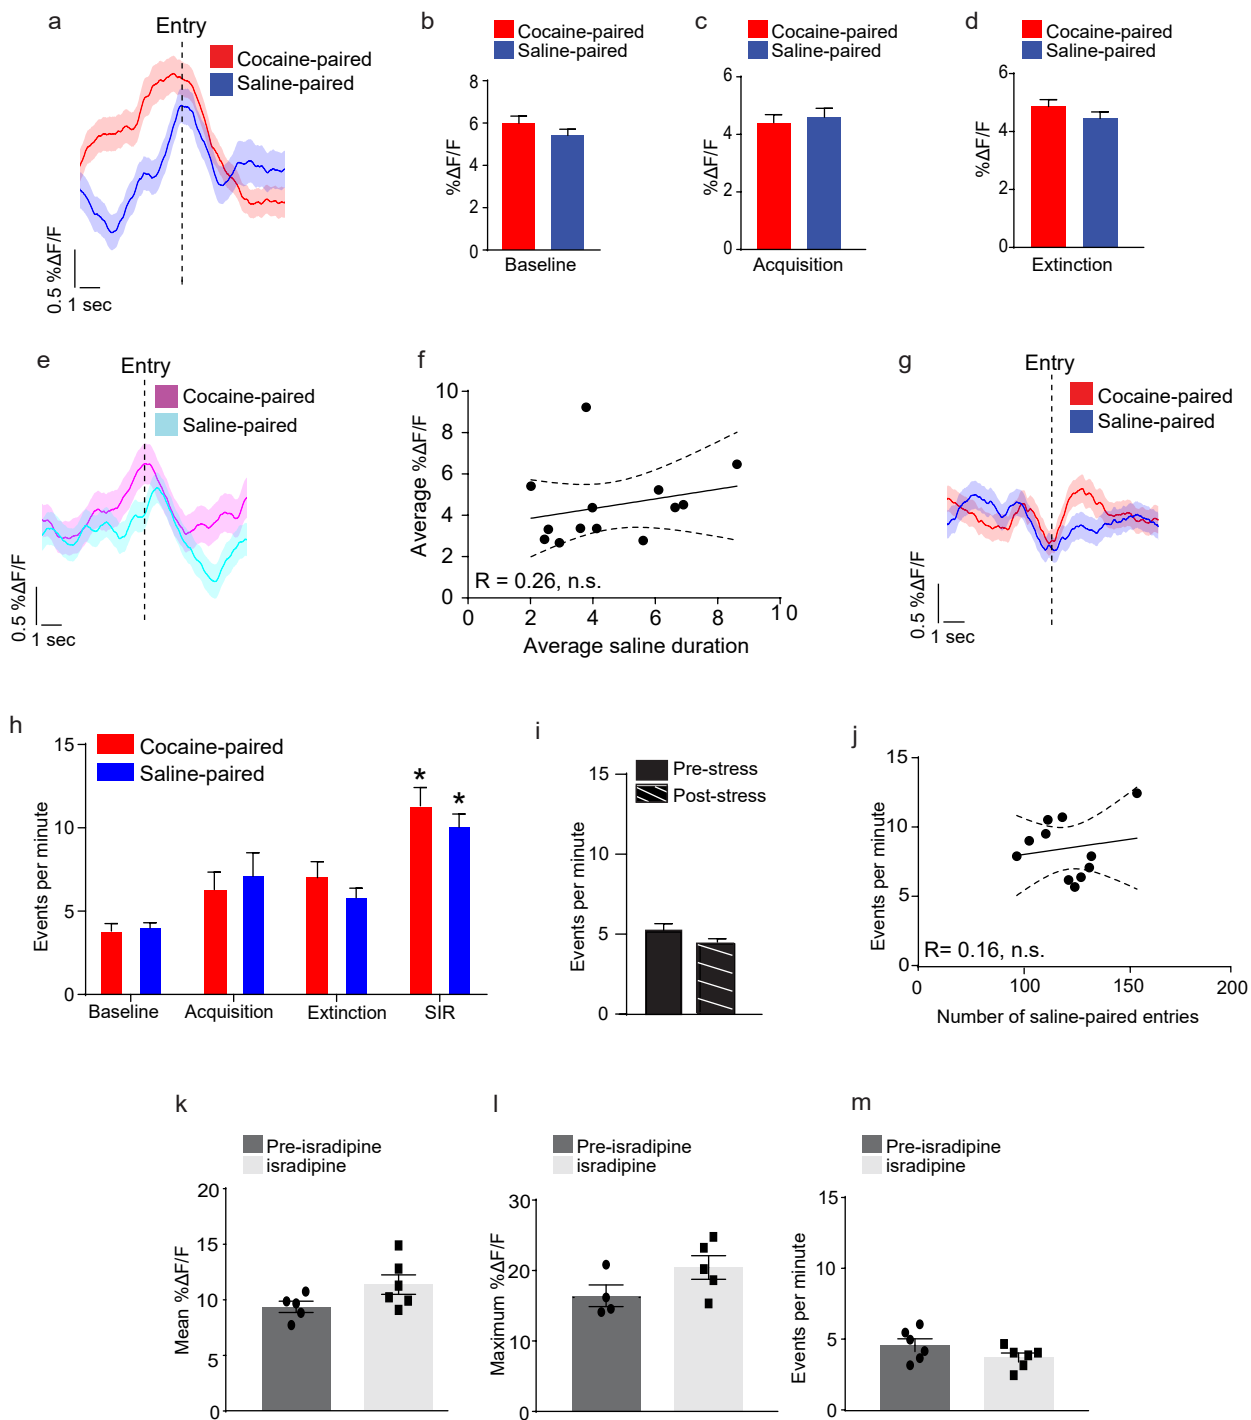

Supplement: NIHMS1625803-supplement-1625803_SuppFig6.pdf [file NIHMS1625803-supplement-1625803_SuppFig6.pdf]

Supplemental Figure 7

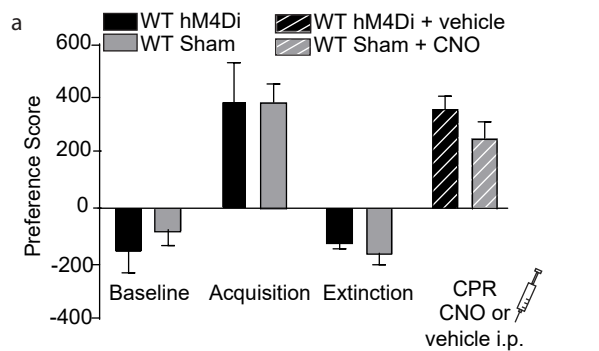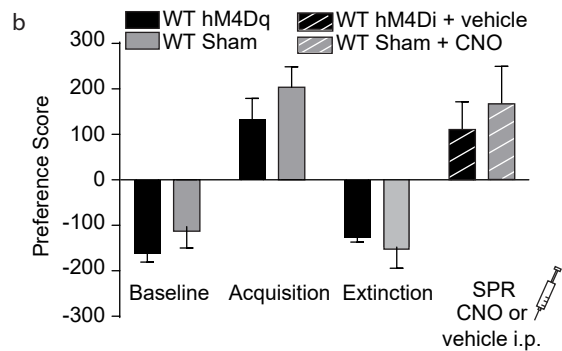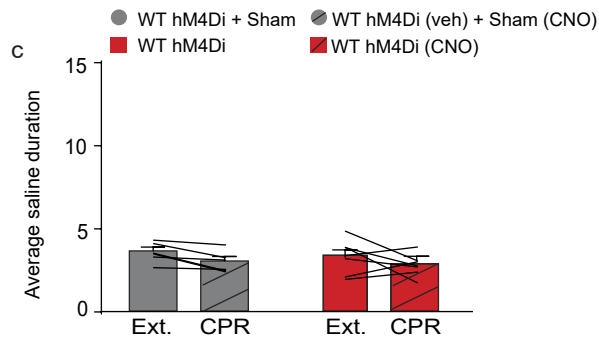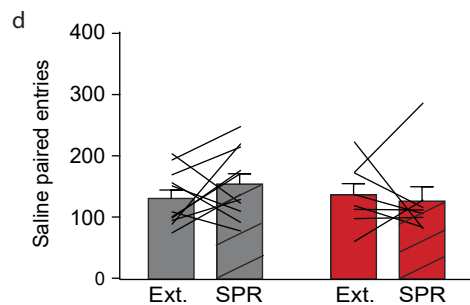

Supplement: NIHMS1625803-supplement-1625803_SuppFig7.pdf [file NIHMS1625803-supplement-1625803_SuppFig7.pdf]

Supplemental Figure 8

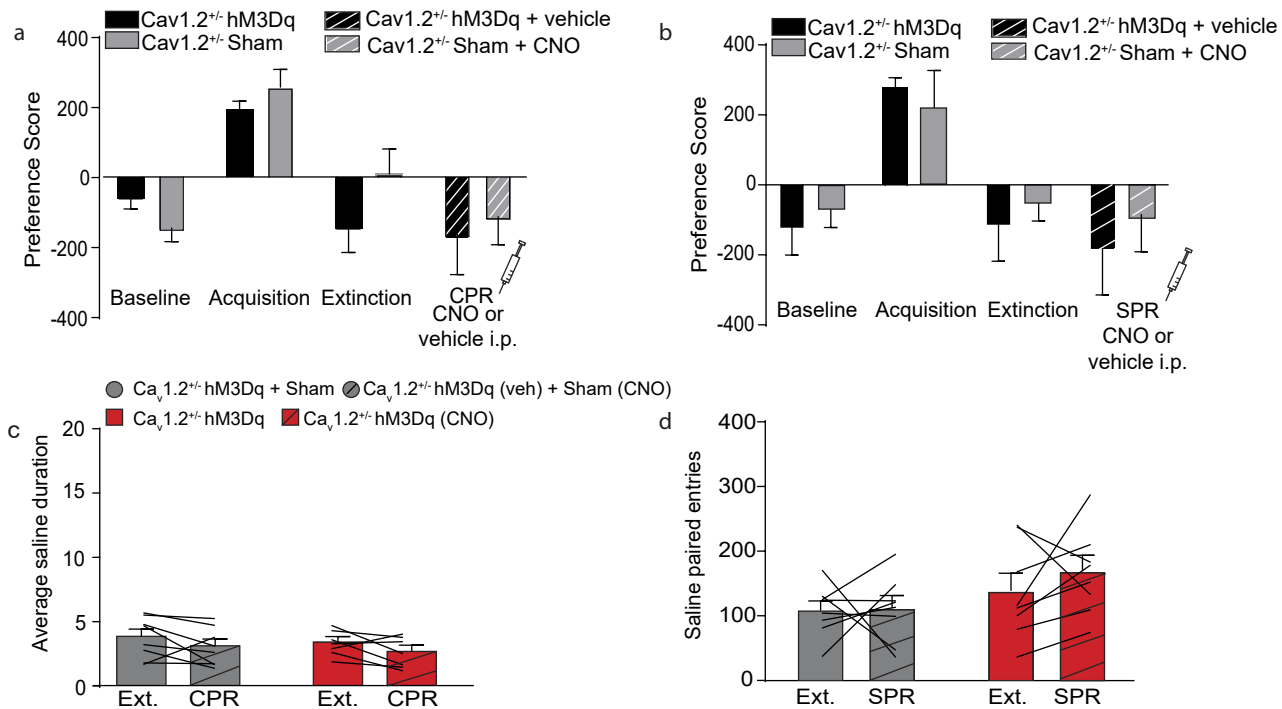

Supplement: NIHMS1625803-supplement-1625803_SuppFig8.pdf [file NIHMS1625803-supplement-1625803_SuppFig8.pdf]
